# Supplementary material
Source: publisher site journal article supplement (https://www.spandidos-publications.com/3912/downloadSupplementary)

Figure S1. Effect of WLGO treatment on mouse body weight. Body weights of mice were detected every day. The following groups were assessed: i) Nor, mice treated with saline; ii) DSS, mice treated with drinking water containing 2.5% DSS; iii) CYN, mice treated with 2.24 g/kg/day CYN; iv) WLGO-High, mice treated with 4.48 g/kg/day WLGO; and v) WLGO-Low, mice treated with 2.24 g/kg/day WLGO. Data are expressed as the mean  $\pm$  SEM. All experiments were performed in triplicate. \* $P < 0.05$ , \*\* $P < 0.01$ , \*\*\* $P < 0.001$ . WLGO, weilan gum oligosaccharide; DSS, dextran sulfate sodium; CYN, Chang Yan Ning; Nor, normal.

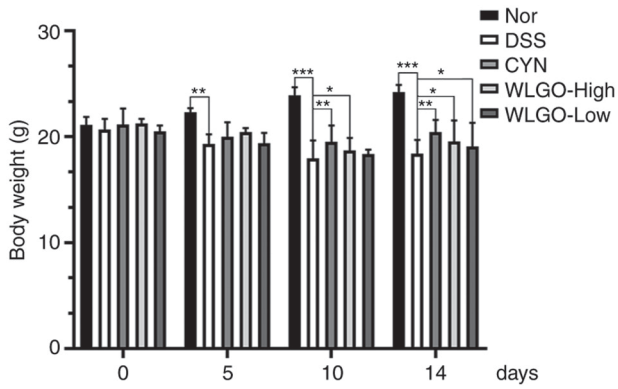

Figure S2. Effects of WLGO treatment on DAI scores of mice. DAI scores of mice were examined every day. The following groups were assessed: i) Nor, mice treated with saline; ii) DSS, mice treated with drinking water containing 2.5% DSS; iii) CYN, mice treated with 2.24 g/kg/day CYN; iv) WLGO-High, mice treated with 4.48 g/kg/day WLGO; and v) WLGO-Low, mice treated with 2.24 g/kg/day WLGO. Data are expressed as the mean  $\pm$  SEM. All experiments were performed in triplicate. \* $P<0.05$ , \*\* $P<0.01$ , \*\*\* $P<0.001$ . WLGO, weilan gum oligosaccharide; DSS, dextran sulfate sodium; CYN, Chang Yan Ning; DAI, disease activity index; Nor, normal.

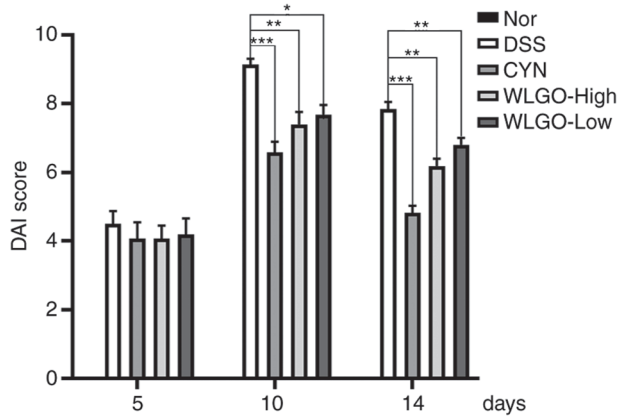

Figure S3. Organs in all treatment groups. Heart, spleen, kidney, lung and liver tissues of mice in each treatment group. The following groups were assessed: i) Nor, mice treated with saline; ii) DSS, mice treated with drinking water containing 2.5% DSS; iii) CYN, mice treated with 2.24 g/kg/day CYN; iv) WLGO-High, mice treated with 4.48 g/kg/day WLGO; v) WLGO-Low, mice treated with 2.24 g/kg/day WLGO. All experiments were performed in triplicate. DSS, dextran sulfate sodium; CYN, Chang Yan Ning; WLGO, weilan gum oligosaccharide; Nor, normal.

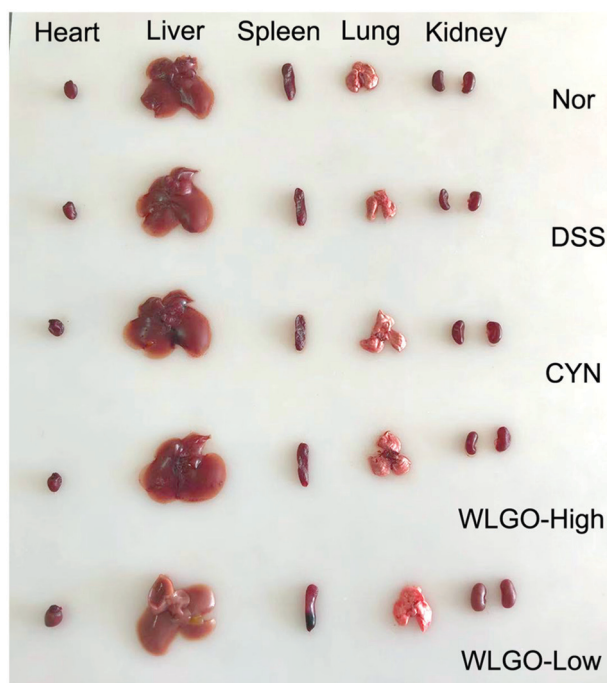

Supplement: Supplementary file 1 [file downloadSupplementary]
